# Supplementary material
Source: Springer Nature journal article supplement (https://www.springermedizin.de/resource/supplementary/12889_2012_4655_MOESM3_ESM.pdf/9493044)

CSHS GP Pharmacy Internet Outreach

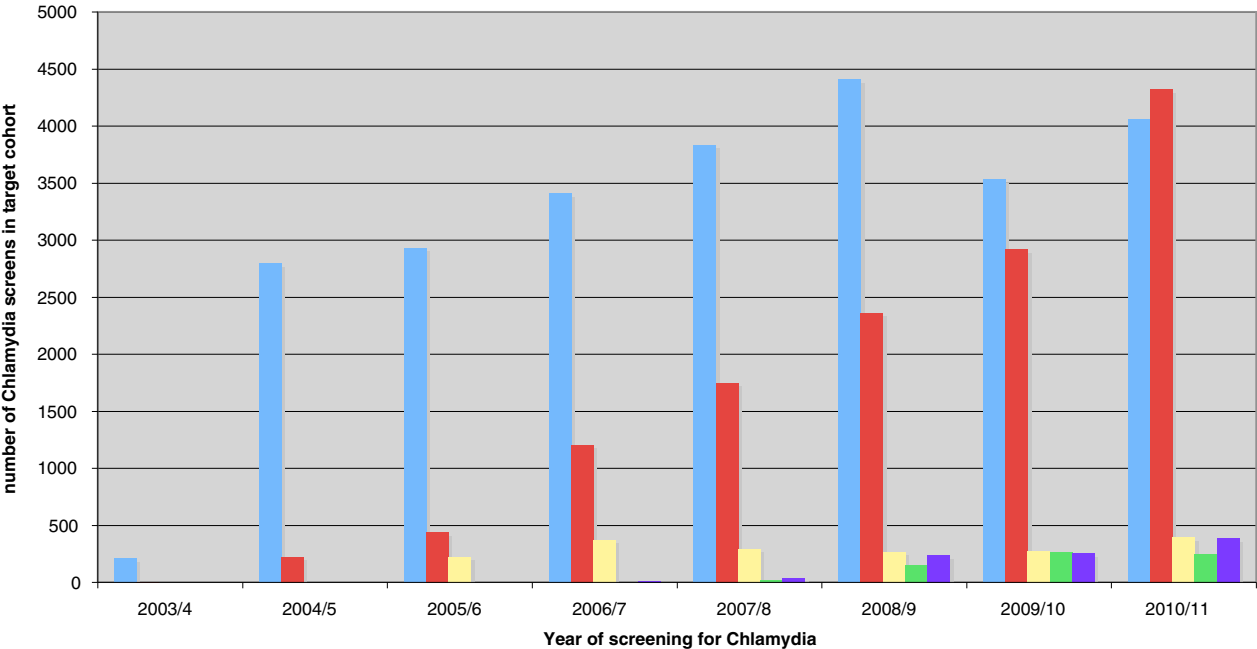

Supplement: MOESM3 [file 9493044]
